# Supplementary material for: Nano-sized mesoporous phosphated tin oxide as an efficient solid acid catalyst
Source: Royal Society of Chemistry journal article supplement (doi:10.1039/c8ra08962k), 2019-01-01
Supplement: c8ra08962k1.pdf [file c8ra08962k1.pdf]

## Nanosized mesoporous phosphated tin oxide as efficient solid acid catalyst

S. M. Hassan<sup>a</sup>, and M. A. Mannaa<sup>a,b</sup>, Amr Awad Ibrahim<sup>a,c\*</sup>

<sup>a</sup> Chemistry Department, Faculty of Science, Mansoura University, Mansoura, Egypt

<sup>b</sup> Chemistry Department, Faculty of Education and Science, Amran University, Sa'dah Yemen.

<sup>c</sup> Department of Chemistry, Virginia Commonwealth University, Richmond, VA 23284-2006, United States

<sup>a,c\*</sup> Corresponding authors., [amr\\_awad@mans.edu.eg](mailto:amr_awad@mans.edu.eg), [aamohammed@vcu.edu](mailto:aamohammed@vcu.edu)

### Supporting information

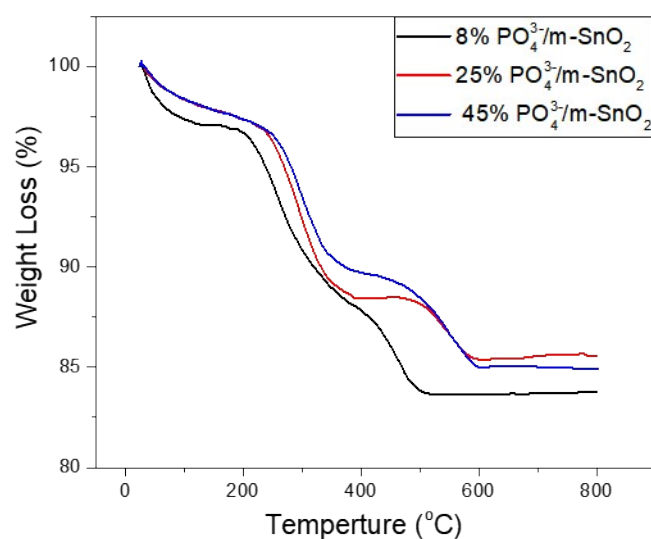

Fig. 1S: TGA curves of (a) 8%, (b) 25% (c) 45% PO<sub>4</sub><sup>3-</sup>/m-SnO<sub>2</sub> samples.

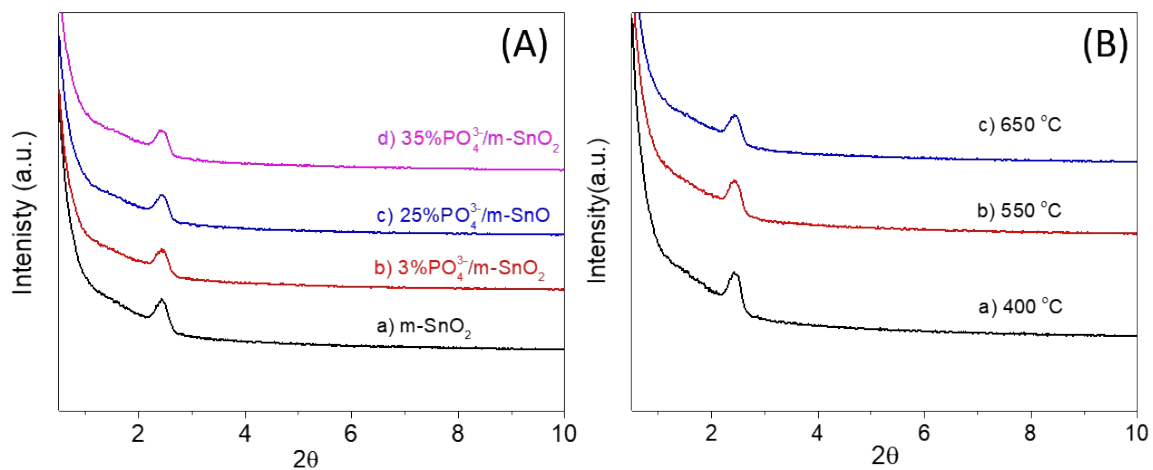

Fig.2S: (A) Low angle XRD pattern of the mesoporous (a) m-SnO<sub>2</sub> (550°C) and the samples PO<sub>4</sub><sup>3-</sup>/SnO<sub>2</sub> (400°C) at (a) m-SnO<sub>2</sub> (b) 3% (c) 25% (d) 35%, (B) Low angle XRD pattern of the sample 3PO<sub>4</sub><sup>3-</sup>/SnO<sub>2</sub> at different temperatures (a) 400°C (b) 550°C (c) 650°C.

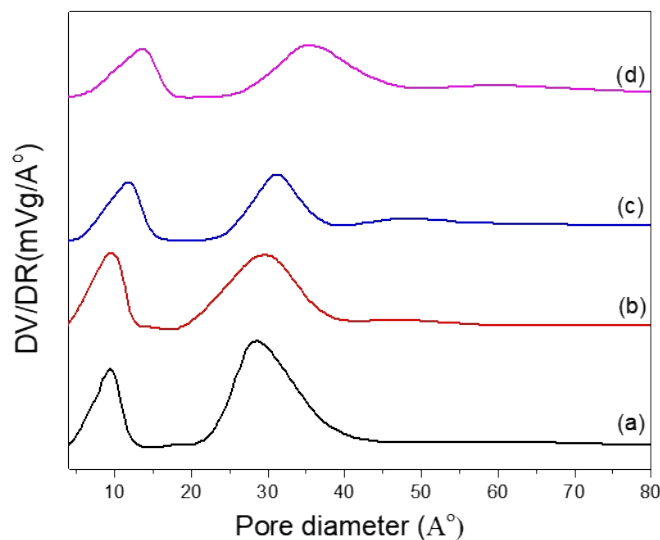

Fig.3S: Pore size distributions of 25% PO<sub>4</sub><sup>3-</sup>/m-SnO<sub>2</sub> samples at (a) 400°; (b) 450°; (c) 550°; (d) 650°C

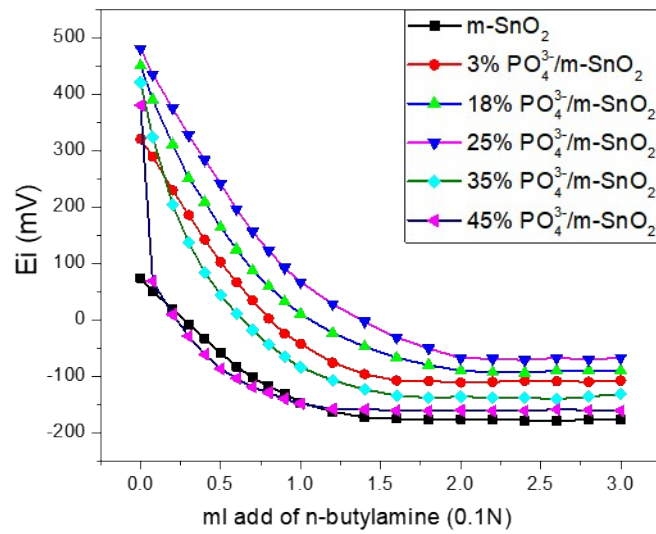

Figure 4S: Potentiometric titration of n-butylamine in acetonitrile for  $\text{PO}_4^{3-}/\text{m-SnO}_2$  catalysts calcined at  $400^\circ\text{C}$ .

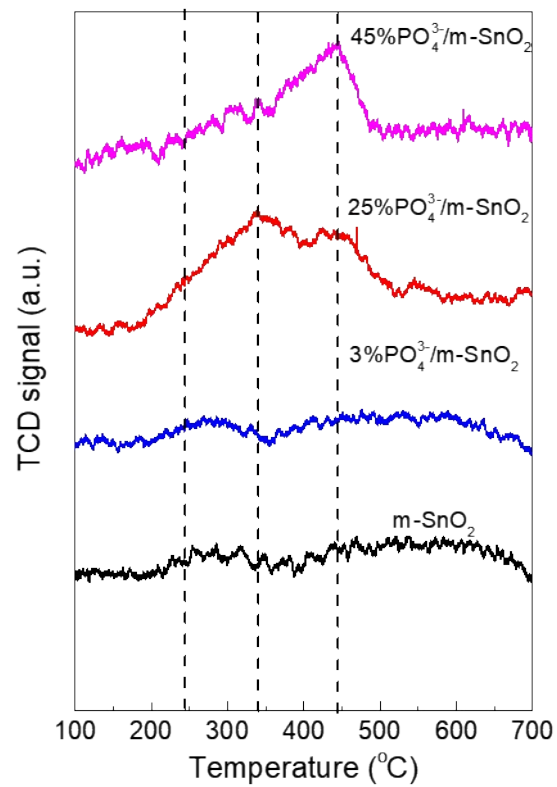

Figure 5S:  $\text{NH}_3$ -TPD profiles of the  $\text{m-SnO}_2$ ,  $3\%\text{PO}_4^{3-}/\text{m-SnO}_2$ ,  $25\%\text{PO}_4^{3-}/\text{m-SnO}_2$  and  $45\%\text{PO}_4^{3-}/\text{m-SnO}_2$  calcined at  $400\text{ }^\circ\text{C}$

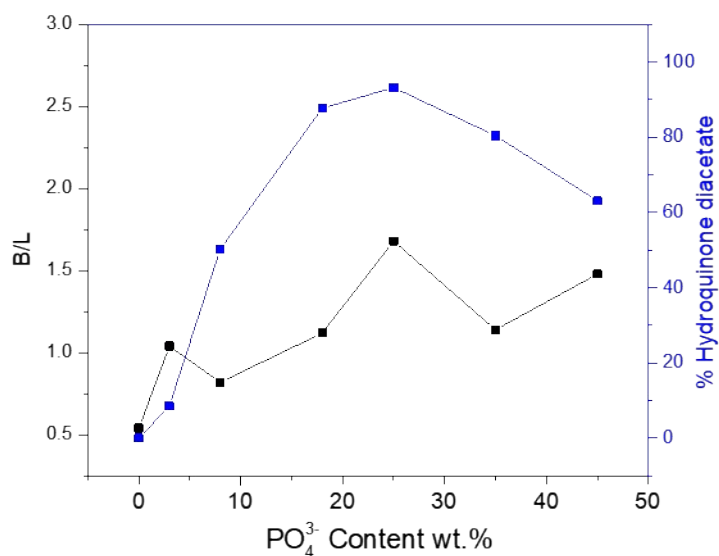

Figure 6S: Effect of  $\text{PO}_4^{3-}$  content wt. % / $\text{mSnO}_2$  calcined at  $400\text{ }^\circ\text{C}$ , on the ratio of Brönsted acid sites to Lewis acid sites and % hydroquinone diacetate.

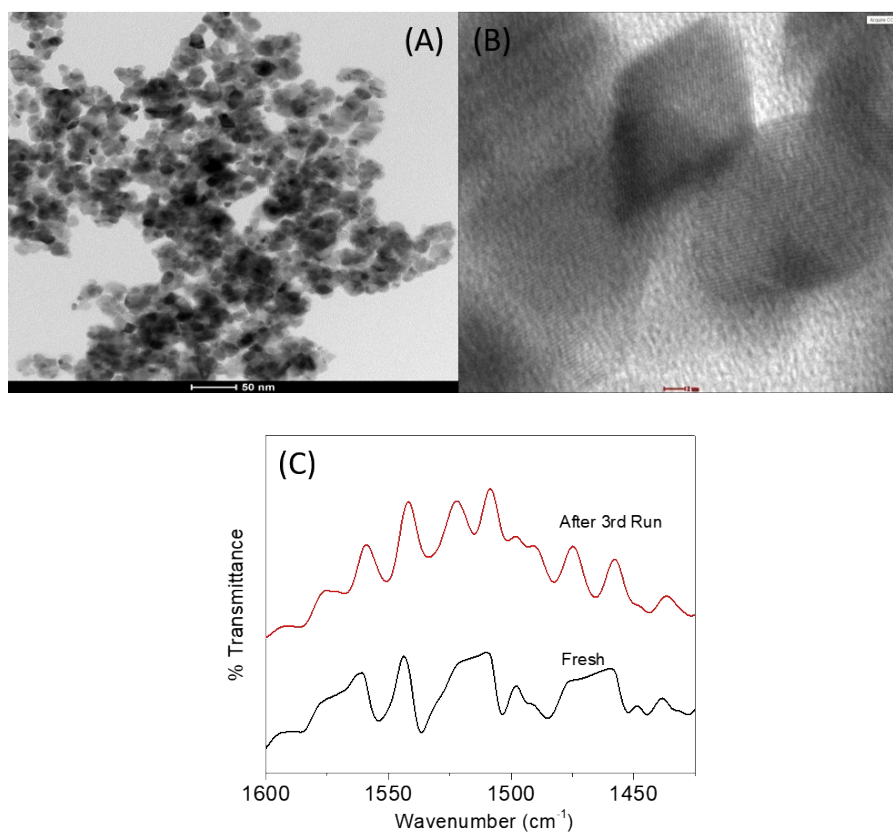

Figure 7S: (A) and (B) TEM images of  $25\%\text{PO}_4^{3-}/\text{mSnO}_2$  calcined at  $400\text{ }^\circ\text{C}$  after 3<sup>rd</sup> run (C) FT-IR spectra of pyridine adsorbed on  $25\%\text{PO}_4^{3-}/\text{mSnO}_2$  calcined at  $400\text{ }^\circ\text{C}$  after 3<sup>rd</sup> run

Table S1: comparison between solid acid catalyst and homogenous acid catalyst using 0.022 mmol of acid.

| sample                                               | Conversion % |
|------------------------------------------------------|--------------|
| 25% PO <sub>4</sub> <sup>3-</sup> /mSnO <sub>2</sub> | 93.2         |
| H <sub>2</sub> SO <sub>4</sub>                       | 82.4         |
| HCl                                                  | 64.7         |

mmol of Acid for the 25%PO<sub>4</sub><sup>3-</sup>/mSnO<sub>2</sub> has been calculated from the total number of acid sites. For the H<sub>2</sub>SO<sub>4</sub> and HCl the same amount of acid concentration has been used
